# Supplementary material
Source: PubMed Central journal article supplement (PMC6947636)
Supplement: pr9b00299_si_001.pdf [file pr9b00299_si_001.pdf]

## Supporting Information

### Global secretome characterization of the pathogenic yeast *Candida glabrata*

Mubashshir Rasheed<sup>1</sup>, Naveen Kumar<sup>1</sup> and Rupinder Kaur<sup>1,\*</sup>

<sup>1</sup>Laboratory of Fungal Pathogenesis, Centre for DNA Fingerprinting and Diagnostics, Hyderabad, Telangana State, India

\*To whom correspondence should be addressed: Rupinder Kaur, Email: [rkaur@cdfd.org.in](mailto:rkaur@cdfd.org.in); Ph: 91-40-27216137

### Supporting Figures: S1 to S4 and Supporting Tables: S1 to S28

#### Supporting Figures S1 to S4

**Figure S1:** Similar growth and viability profiles of *C. glabrata* wild-type (*wt*) and *Cgyps1-11Δ* strains at the time of secretome collection. **Pages S3 & S4.**

**Figure S2:** The *CgMSB2* gene is modestly upregulated in the *Cgyps1-11Δ* mutant. **Page S5.**

**Figure S3:** The *Cgyps1-11Δ* and *Cgyps7Δ* mutants show enhanced sensitivity to the cell wall stressor congo red. **Page S6.**

**Figure S4:** Comparative analysis of global secretomes of wild-type, *Cgyps1-11Δ*, *Cgyps7Δ* and *Cgyps2ΔCA* strains. **Page S7.**

#### Supporting Tables S1 to S28

**Tables S1 to S28 are presented in a MS-Excel file, with 34 spreadsheets labelled with the individual table number.**

**Table S1:** A list of mass spectrometry parameters used for global secretome analysis.

**Table S2:** A list of mass spectrometry parameters used for quantitative secretome analysis.

**Table S3:** A list of 119 proteins identified in the wild-type secretome in global secretome analysis.

**Table S4:** A list of 548 proteins identified in the *Cgyps1-11Δ* secretome in global secretome analysis.

**Table S5:** Functional classification of putative GPI-anchored proteins identified in the secretomes of wild-type and *Cgyps1-11Δ* strains.

**Table S6:** DeepLoc 1.0 web server-based subcellular localization analysis of proteins identified in the wild-type secretome.

**Table S7:** DeepLoc 1.0 web server-based subcellular localization analysis of proteins identified in the *Cgyps1-11Δ* secretome.

**Table S8:** Enriched GO terms for biological process (BP), cellular component (CC) and molecular function (MF) categories for the wild-type secretome, as determined by the FungiFun tool.

**Table S9:** Enriched GO terms for biological process (BP), cellular component (CC) and molecular function (MF) categories for the *Cgyps1-11Δ* secretome, as determined by the FungiFun tool.

**Table S10:** Comparative analysis of identified and predicted secretome of *C. glabrata*.

**Table S10.1:** Comparative analysis of identified and predicted secretome of *wild-type*.

**Table S10.2:** Comparative analysis of the identified *Cgyps1-11Δ* secretome with the predicted *wild-type* secretome.

**Table S11:** A list of 29 proteins identified in the *wild-type* secretome, that were not predicted to be secretory.

**Table S12:** Comparative analysis of identified secretory proteins in *C. glabrata*, *C. albicans* and *S. cerevisiae*.

**Table S12.1:** List of *C. glabrata* proteins used for the analysis.

**Table S12.2:** List of *C. albicans* proteins used for the analysis.

**Table S12.3:** List of *S. cerevisiae* proteins used for the analysis.

**Table S13:** Analysis of secretory proteins that are unique to *C. glabrata*.

**Table S13.1:** A list of 49 proteins, that are unique to the secretome of *C. glabrata*.

**Table S13.2:** Enriched GO terms for biological process (BP), cellular component (CC) and molecular function (MF) categories in the unique 49-protein set, as determined by the GO Slim Mapper tool of *Candida* Genome Database.

**Table S14:** A list of 85 proteins identified in the *wild-type* secretome by label-free quantitative secretome profiling.

**Table S15:** A list of 193 proteins identified in the *Cgyps1-11Δ* secretome by label-free quantitative secretome profiling.

**Table S16:** Enriched GO terms for biological process (BP), cellular component (CC) and molecular function (MF) categories, as determined by the FungiFun tool, in the set of 114 proteins, that were unique to the *Cgyps1-11Δ* secretome in quantitative secretome analysis.

**Table S17:** Enriched GO terms for biological process (BP), cellular component (CC) and molecular function (MF) categories, as determined by the FungiFun tool, in the set of 61 proteins, identified in *wt* secretome by both global and quantitative analysis.

**Table S18:** Enriched GO terms for biological process (BP), cellular component (CC) and molecular function (MF) categories, as determined by the FungiFun tool, in the set of 155 proteins, identified in *Cgyps1-11Δ* secretome by both global and quantitative analysis.

**Table S19:** A list of 53 common proteins in *wild-type* and *Cgyps1-11Δ* secretomes, that were identified by both global and quantitative secretome profiling.

**Table S20:** A list of 79 proteins displaying differential abundance in the *Cgyps1-11Δ* secretome based on the peptide number ratio.

**Table S21:** Relative abundance analysis, using spectral counting-based approach, of proteins identified in the global secretome.

**Table S21.1:** Relative abundance of 119 proteins identified in the *wild-type* secretome.

**Table S21.2:** Relative abundance of 548 proteins identified in the *Cgyps1-11Δ* secretome

**Table S22:** Relative abundance analysis, using spectral counting-based approach, of proteins identified in the quantitative secretome.

**Table S22.1:** Relative abundance of 85 proteins identified in the *wild-type* secretome.

**Table S22.2:** Relative abundance of 193 proteins identified in the *Cgygs1-11Δ* secretome.

**Table S23:** A list of 59 proteins identified in the *Cgygs7Δ* secretome in global secretome analysis.

**Table S24:** A list of 52 proteins identified in the *Cgygs2ΔCA* secretome in global secretome analysis.

**Table S25:** DeepLoc 1.0 web server-based subcellular localization analysis of proteins identified in the *Cgygs7Δ* secretome.

**Table S26:** DeepLoc 1.0 web server-based subcellular localization analysis of proteins identified in the *Cgygs2ΔCA* secretome.

**Table S27:** Enriched GO terms for biological process (BP), cellular component (CC) and molecular function (MF) categories for the *Cgygs7Δ* secretome, as determined by the FungiFun tool.

**Table S28:** Enriched GO terms for biological process (BP), cellular component (CC) and molecular function (MF) categories for the *Cgygs2ΔCA* secretome, as determined by the FungiFun tool.

# Figure S1

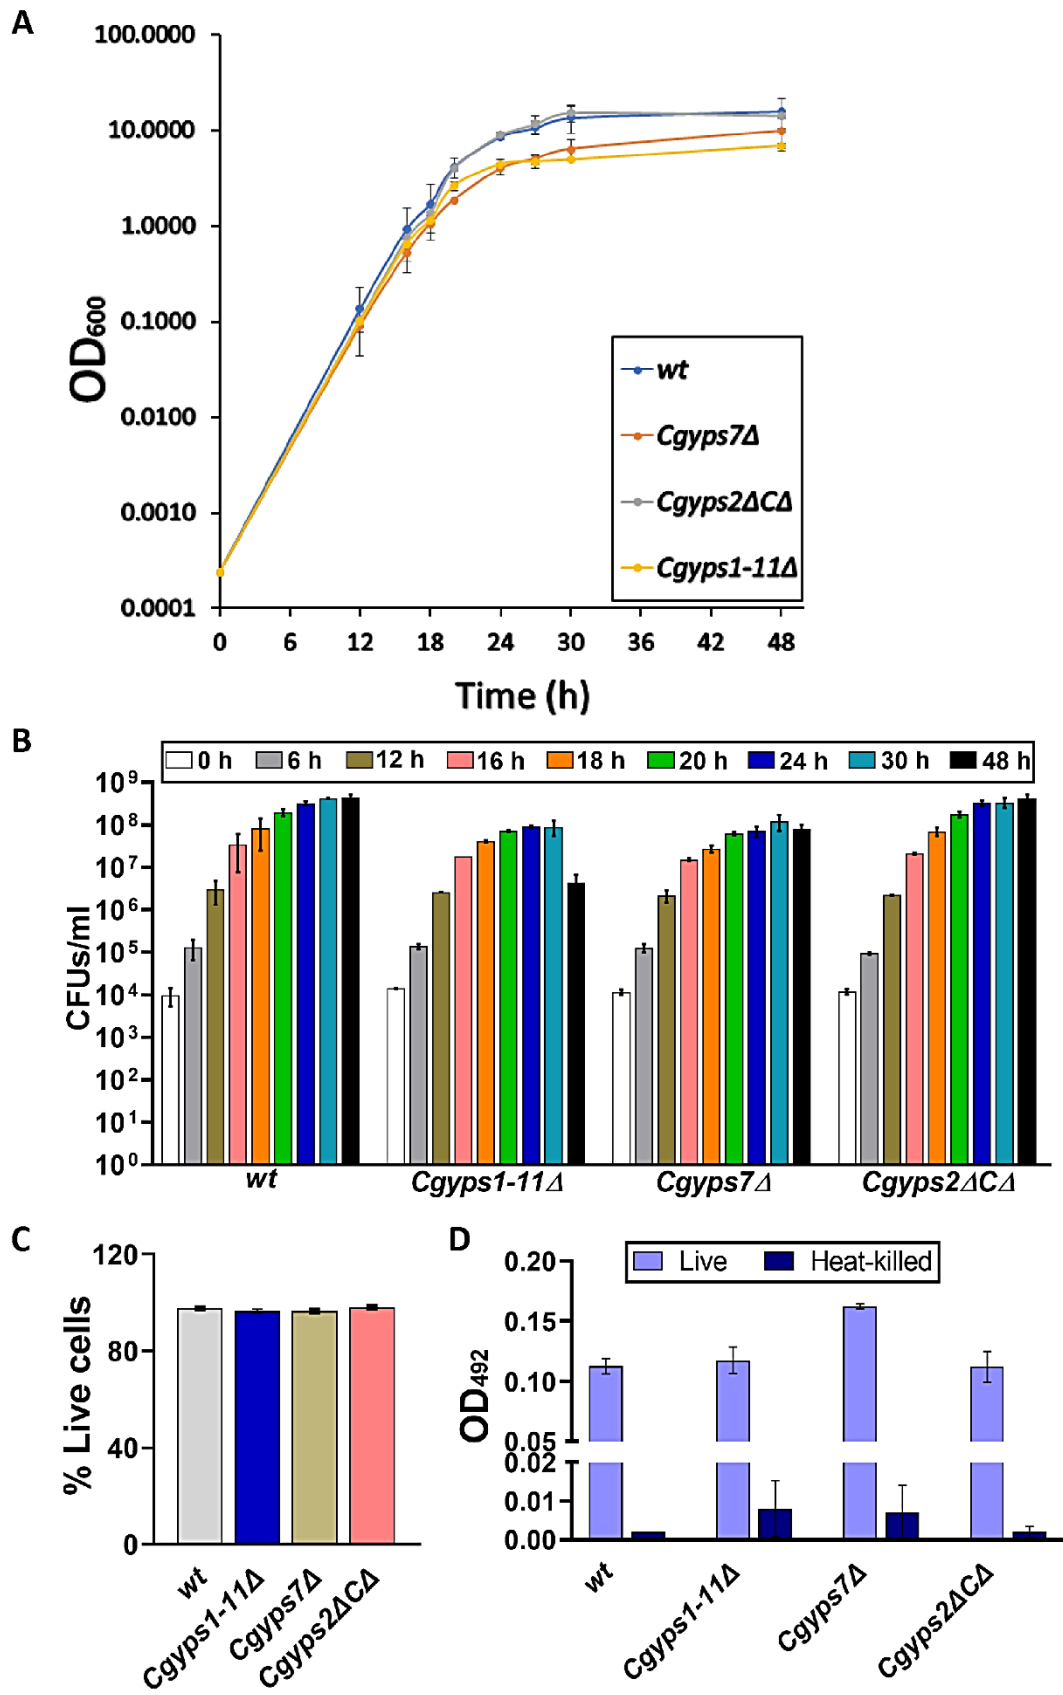

**Figure S1: Similar growth and viability profiles of *C. glabrata* wild-type (*wt*) and *Cgyps1-11Δ* strains at the time of secretome collection.**

- A. Growth curve analysis.** Indicated *C. glabrata* strains were grown overnight in YPD medium and inoculated at an initial OD<sub>600</sub> of 0.0002 in YNB medium. The OD<sub>600</sub>, once reached the measurable range of 0.1, was monitored at regular intervals up to 48 h. Absorbance data are plotted against time and represent mean ± SD of two independent experiments. Secretome collection was done from cultures, once they showed an OD<sub>600</sub> of 1.2 to 1.5.
- B. CFU-based cell viability analysis:** At indicated time intervals, an aliquot of *C. glabrata* cultures, from the time-course analysis shown in panel A, was taken, diluted appropriately in PBS and plated on YPD medium. After multiplying the number of colonies appeared by dilution factor, data were plotted, and represent mean ± SD of two independent experiments. No statistically significant differences were observed between *wt* and *Cgyps1-11Δ* mutant CFUs at the time of inoculation (0 h) or secretome collection (16-20 h). Consistent with an earlier report (Bairwa and Kaur, *Mol Microbiol* **79**: 900-913, 2011), viability loss for *Cgyps1-11Δ* mutant was observed under post-diauxic shift conditions between 30 and 48 h.
- C. Methylene blue staining-based cell viability analysis:** Indicated *C. glabrata* strains were grown overnight in YPD medium and inoculated at an initial OD<sub>600</sub> of 0.0002 in YNB medium. At 18 h post inoculation, 2 ml culture, corresponding to ~ 2 OD<sub>600</sub>, was taken, and cells were pelleted down and stained with 30 µl of 1 X methylene blue solution (Qualigens # 38883). After 15 min, cells were mounted on a slide and visualized using 100 X objective (Nikon Eclipse 80i). A minimum of 500 cells were counted in five arbitrary chosen fields, and the number of live (unstained) and dead cells (darkly stained) recorded. Data (mean ± SD; n=2) represent the of % live cells in *C. glabrata* cultures.
- D. XTT assay-based cell viability analysis:** Indicated *C. glabrata* strains were grown overnight in YPD medium and inoculated at an initial OD<sub>600</sub> of 0.0002 in YNB medium. At 18 h post inoculation, 0.5 OD<sub>600</sub> cells were taken and treated with 50 µl of XTT sodium salt solution (1 mg/ml) and 4 µL of menadione solution (250 mM; prepared in acetone). After incubation at 37°C for 5 h with constant shaking, cells were spun down and absorbance at 492 nm, as a read-out of amount of formazan produced, was measured. Head-killed cells, prepared by incubation at 95°C for 20 min, were used as a negative control. Data represent mean ± SD of two independent experiments.

Figure S2

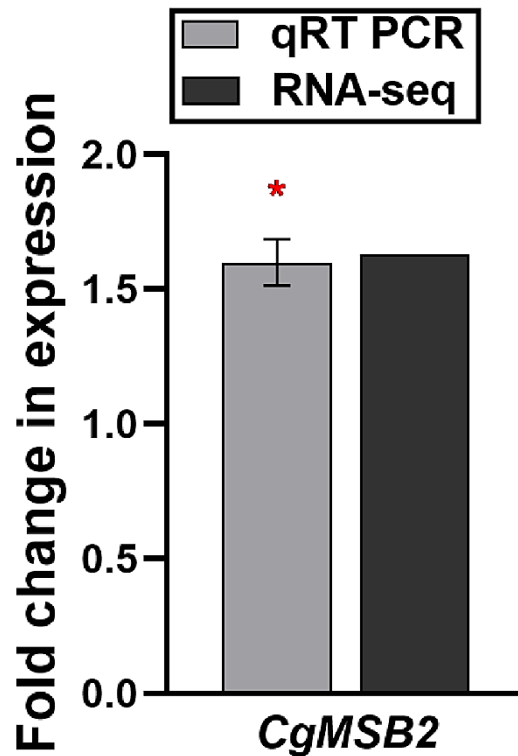

**Figure S2: The *CgMSB2* gene is modestly upregulated in the *Cgypts1-11Δ* mutant.** Using the acid phenol extraction method, total RNA was extracted from log-phase *wt* and *Cgypts1-11Δ* cultures. *CgMSB2* (*CAGL0F08833g*) transcript levels were measured by qPCR. Data (mean  $\pm$  S.E.,  $n = 3$ ) were normalized against the *CgACT1* mRNA control, and represent fold increase in expression in the *Cgypts1-11Δ* mutant compared to the *wt* strain. The second bar represents *CgMSB2* gene expression, as reported previously in RNA-sequencing-based transcriptional profiling of log-phase *Cgypts1-11Δ* cells [Rasheed *et al.*, *J Biol Chem* **293**:6410-6433, 2018]. \*,  $p < 0.05$ , paired two tailed student's t-test.

## Figure S3

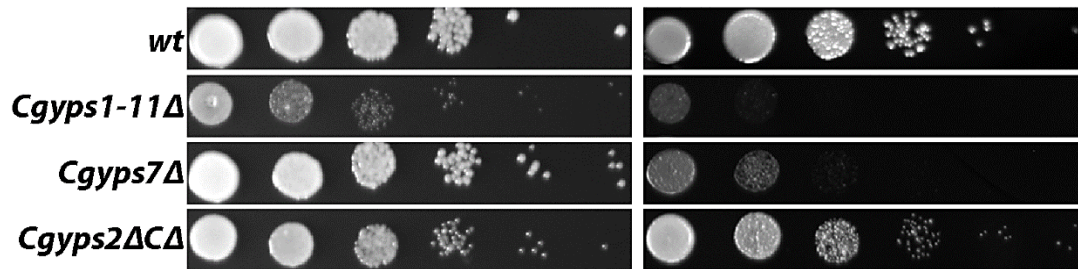

**Figure S3: The *Cgyps1-11Δ* and *Cgyps7Δ* mutants show enhanced sensitivity to the cell wall stressor congo red.** Indicated *C. glabrata* strains were grown overnight in YPD medium and OD<sub>600</sub> was normalized to 1.0. Cultures were 10-fold serially diluted, and 3  $\mu$ l of each dilution were spotted on the YPD medium lacking or containing congo red (2 mg/ml). Plates were incubated at 30°C for 1-2 days, and images were captured.

**Figure S4**

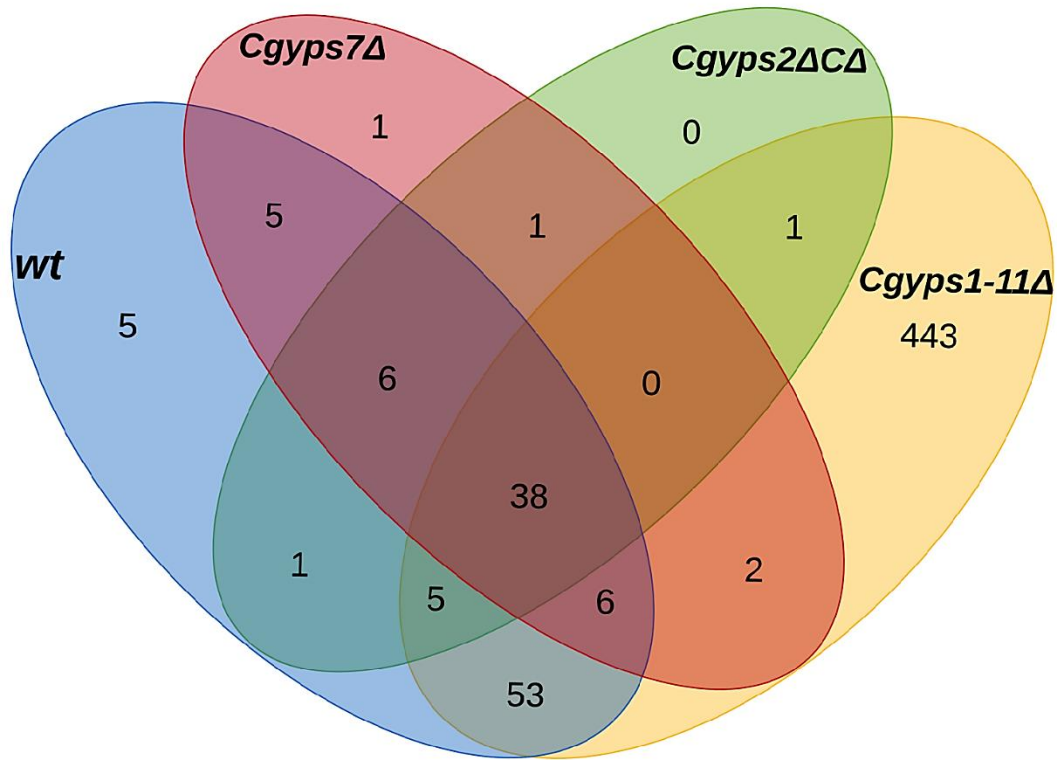

**Figure S4: Comparative analysis of global secretomes of wild-type, *Cgyps1-11Δ*, *Cgyps7Δ* and *Cgyps2ΔCA* strains.** Venn diagram illustrating overlap in proteins identified in global secretomes of wild-type (*wt*), *Cgyps1-11Δ*, *Cgyps7Δ* and *Cgyps2ΔCA* strains.
